# Supplementary material for: Combined Single Cell Transcriptome and Surface Epitope Profiling Identifies Potential Biomarkers of Psoriatic Arthritis and Facilitates Diagnosis via Machine Learning
Source: Front Immunol. 2022 Mar 2;13:835760. doi: 10.3389/fimmu.2022.835760 (PMC8924042; doi:10.3389/fimmu.2022.835760)
Supplement: Supplementary file 2 [file Table_1.xlsx]

## Sheet: info
Supplementary Table 1. Subject information.
Variable	Description
SubjectID	Subject ID in sequencing data
Age	Age in years
Gender	Self-reported gender
Status	PSA: CASPAR-diagnosed psoriatic arthritis, PSO: cutaneous psoriasis, PSX: cutaneous psoriasis with joint complaints but no CASPAR diagnosis of PSA
Ethnicity	Self-reported ethnicity
BMI	body mass index
BSA	1=(<1% body surface area)	2= (1-5% body surface area)	3=(5-10% body surface area)	4=(11-20% body surface area)	5= (>20% body surface area)
PASI	Psoriasis Area and Severity Index (indicated in parentheses)
Joint Pain	Y=Joint pain present	N=Joint pain absent
Systemic Medications	Medications

## Sheet: PatientInfo
SubjectID	Age	Gender	Status	Ethnicity	BMI	Psoriasis BSA or (PASI)	Joint pain	Systemic Medications
HC01	61	M	Healthy	White	28.97	NA	N	None
HC02	64	M	Healthy	White	NA	NA	N	None
HC03	37	F	Healthy	Asian	22.86	NA	N	None
HC04	28	M	Healthy	Asian	28.19	NA	N	None
HC05	26	F	Healthy	Asian	18.55	NA	N	None
HC06	72	F	Healthy	NA	20.99	NA	N	None
HC07	41	F	Healthy	White	32.28	NA	N	None
HC08	57	F	Healthy	Asian	20.7	NA	N	None
HC09	49	F	Healthy	Other	21.22	NA	N	None
HC10	38	M	Healthy	African American	34.99	NA	N	None
HC11	59	M	Healthy	White	24.21	NA	N	None
HC12	35	M	Healthy	African American	29.56	NA	N	None
HC13	37	F	Healthy	White	31.82	NA	N	None
HC14	26	M	Healthy	Asian	18.73	NA	N	None
HC15	22	F	Healthy	Asian	NA	NA	N	None
HC16	26	F	Healthy	White	23.3	NA	N	None
HC17	32	M	Healthy	White	NA	NA	N	None
HC18	47	M	Healthy	Other	26.34	NA	N	None
HC19	41	F	Healthy	Asian	27.83	NA	N	None
HC20	48	F	Healthy	Asian	21.87	NA	N	None
HC21	64	M	Healthy	Asian	23.72	NA	N	None
HC22	34	F	Healthy	Asian	24.49	NA	N	None
HC23	28	M	Healthy	NA	NA	NA	N	None
HC24	25	F	Healthy	Hispanic	33.47	NA	N	None
HC25	36	F	Healthy	Asian	22.86	NA	N	None
HC26	33	M	Healthy	White	NA	NA	N	None
HC27	46	F	Healthy	Hispanic	25.58	NA	N	None
HC28	48	F	Healthy	White	24.84	NA	N	None
HC29	52	F	Healthy	Asian	20.48	NA	N	None
PSO01	39	M	PSO	Asian	27.8	NA	N	None
PSO02	60	M	PSO	Asian	19.4	NA	Y	None
PSO03	79	F	PSO	White	19.13	(60)	N	None
PSO04	32	M	PSO	White	20.99	(7)	Y	None
PSO05	42	F	PSO	White	20.18	(3.4)	Y	None
PSO06	53	F	PSO	White	36.58	(31.1)	Y	None
PSO07	57	M	PSO	White	25.06	(7.8)	N	None
PSO08	28	F	PSO	White	30.66	(13.2)	N	None
PSO09	28	M	PSO	Asian	27.99	(19.8)	Y	None
PSO10	55	M	PSO	Asian	30.01	1	Y	None
PSO11	48	F	PSO	White	26.79	5	N	None
PSO12	48	M	PSO	White	27.7	2	N	None
PSO13	31	M	PSO	NA	30.17	4	N	None
PSO14	66	F	PSO	White	29.95	3	N	None
PSO15	43	M	PSO	White	NA	2	N	None
PSO16	29	F	PSO	White	22.82	3	N	None
PSO17	33	F	PSO	White	23.2	4	N	None
PSO18	58	F	PSO	White	31.62	3	N	None
PSO19	55	F	PSO	Other	NA	2	N	None
PSO20	26	M	PSO	NA	NA	2	N	None
PSO21	53	M	PSO	White	40.69	4	N	None
PSO22	38	M	PSO	Other	26.61	4	N	None
PSO23	43	F	PSO	White	24.76	2	N	None
PSO24	37	M	PSO	White	NA	4	N	None
PSA01	36	F	PSA	Asian	21.52	2	Y	methotrexate
PSA02	41	F	PSA	Asian	25.74	1	Y	guselkumab
PSA03	33	M	PSA	Asian	NA	3	Y	ustekinumab
PSA04	53	M	PSA	Asian	19.58	NA	Y	etanercept
PSA05	21	M	PSA	White	21.75	2	Y	brodalumab
PSA06	35	M	PSA	White	40.04	3	Y	secukinumab
PSA07	37	M	PSA	White	21.9	1	Y	adalimumab
PSA08	78	M	PSA	White	NA	NA	Y	None
PSA09	38	M	PSA	Hispanic	29.5	4	Y	adalimumab
PSA10	36	M	PSA	Hispanic	26.52	NA	Y	adalimumab
PSA11	60	M	PSA	NA	NA	2	Y	methotrexate
PSA12	51	M	PSA	Hispanic	24.4	2	Y	None
PSA13	35	F	PSA	Asian	22.46	5	Y	adalimumab
PSA14	47	F	PSA	Hispanic	39.6	3	Y	apremilast
PSA15	40	M	PSA	White	26.18	5	Y	certolizumab pegol
PSA16	31	F	PSA	NA	34.54	5	Y	None
PSA17	36	F	PSA	Hispanic	48.4	1	Y	risankizumab
PSA18	73	F	PSA	White	24.5	5	Y	None
PSA19	51	F	PSA	White	46.1	5	Y	None
PSA20	32	M	PSA	White	23.34	5	Y	adalimumab
PSA21	37	M	PSA	Asian	33.78	1	Y	etanercept
PSA22	32	M	PSA	White	26.41	1	Y	adalimumab
PSA23	49	M	PSA	White	29.73	4	Y	secukinumab
PSA24	54	M	PSA	Asian	30.01	3	N	None
PSA25	67	M	PSA	White	29.63	2	Y	NA
PSA26	77	M	PSA	White	29.29	3	Y	etanercept
PSA27	33	F	PSA	White	29.38	2	Y	None
PSA28	68	F	PSA	White	NA	5	Y	ustekinumab
PSX01	53	F	PSX	White	21.64	3	Y	None
PSX02	44	F	PSX	NA	NA	NA	Y	NA
PSX03	28	M	PSX	White	20.7	3	Y	None
PSX04	64	F	PSX	Asian	27.3	2	Y	None
PSX05	56	F	PSX	White	21.3	2	Y	None
PSX06	26	F	PSX	Other	23.5	2	Y	None
PSX07	67	M	PSX	Other	20.8	3	Y	None
PSX08	41	F	PSX	White	21.3	3	Y	None
PSX09	51	F	PSX	Other	54.6	5	Y	None
PSX10	50	F	PSX	Asian	26.8	3	Y	None
PSX11	46	F	PSX	Other	26.7	5	Y	guselkumab
PSX12	38	M	PSX	Asian	28.41	5	Y	None
PSX13	45	M	PSX	White	22.57	4	Y	None
PSX14	64	M	PSX	Asian	24.68	4	Y	None
