# Supplementary material for: Combined Single Cell Transcriptome and Surface Epitope Profiling Identifies Potential Biomarkers of Psoriatic Arthritis and Facilitates Diagnosis via Machine Learning
Source: Front Immunol. 2022 Mar 2;13:835760. doi: 10.3389/fimmu.2022.835760 (PMC8924042; doi:10.3389/fimmu.2022.835760)
Supplement: Supplementary file 6 [file Table_5.xlsx]

## Sheet: info
Supplementary Table 5. Gene and protein markers of clusters significantly different between PSA, PSO, and healthy subjects.
Variable	Description
p_val	unadjusted p-value
avg_log2FC	log2 fold-change between the mean expression of a gene feature within cells of Cluster (numerator) compared to cells not in Cluster
avg_diff	difference between the mean expression of a protein feature within cells of Cluster compared to cells not in Cluster
pct.1	percentage of cells in Cluster that express the feature
pct.2	percentage of cells not in the Cluster that express the feature
p_val_adj	Bonferroni-adjusted p-value
Cluster	Cluster within CellType for which the gene or protein feature is a marker
Gene	HGNC gene symbol of gene feature
Protein	Name of protein feature
CellType	Cell type in which differentially expressed markers are calculated

## Sheet: Genes
p_val	avg_log2FC	pct.1	pct.2	p_val_adj	Cluster	Gene	CellType
0	2.83192	1	0.536	0	11	CCL4	CD8 TEM
3.97341e-24	0.839003	0.861	0.573	6.31136e-20	7	CRIP1	CD16 Mono
4.32697e-08	0.765913	0.509	0.188	0.000687296	7	RETN	CD16 Mono
2.37649e-14	0.360321	0.995	0.984	3.46088e-10	1	ACTB	Treg
6.35715e-88	0.619861	0.243	0.1	1.1605e-83	11	CCL4L2	CD8 TEM
3.26455e-08	0.600783	0.722	0.529	0.000518541	7	RP11-160E2.6	CD16 Mono
1.03166e-06	0.587293	0.787	0.513	0.0163869	7	RPS4Y1	CD16 Mono
2.68349e-14	0.567397	1	0.993	4.26245e-10	7	LGALS1	CD16 Mono
7.00536e-09	0.545897	0.944	0.934	0.000111273	7	RPL36A	CD16 Mono
4.4997e-11	0.528859	1	0.99	7.14733e-07	7	RPS10	CD16 Mono
5.0153e-34	-0.715285	0.961	0.99	7.30379e-30	6	ACTB	Treg
8.64779e-18	-0.534004	0.838	0.913	1.25938e-13	6	ACTG1	Treg
2.16798e-12	0.494795	1	0.989	3.44361e-08	7	KLF2	CD16 Mono
2.24722e-06	-0.252158	0.411	0.527	0.0327262	6	ACTR2	Treg
3.56343e-09	0.490073	0.88	0.599	5.66015e-05	7	HLA-DRB5	CD16 Mono
1.57138e-13	-0.36533	0.737	0.839	2.28841e-09	6	AES	Treg
3.0315e-16	0.474887	1	0.994	4.81524e-12	7	EMP3	CD16 Mono
2.86442e-16	0.472943	0.88	0.757	4.54984e-12	7	CTSD	CD16 Mono
1.28072e-22	0.472562	0.368	0.206	2.33795e-18	11	IFNG	CD8 TEM
1.14233e-18	-0.475277	0.309	0.522	1.66358e-14	6	AHNAK	Treg
4.23588e-14	-0.350493	0.088	0.27	6.16871e-10	6	ALOX5AP	Treg
3.28238e-15	0.299199	0.454	0.279	4.78012e-11	1	ANXA2	Treg
1.68649e-17	-0.458979	0.104	0.342	2.45603e-13	6	ANXA2	Treg
3.54532e-35	0.437282	0.828	0.713	6.47197e-31	11	KLF6	CD8 TEM
1.12628e-10	-0.325028	0.118	0.305	1.6402e-06	6	ANXA5	Treg
1.80051e-11	0.427595	0.648	0.422	2.85993e-07	7	CDA	CD16 Mono
2.16135e-16	-0.493771	0.718	0.854	3.14758e-12	6	ARHGDIB	Treg
5.32172e-08	-0.290157	0.358	0.484	0.000775002	6	ARID5B	Treg
4.6579e-14	-0.420054	0.473	0.643	6.7833e-10	6	ARPC1B	Treg
1.1216e-06	0.39556	0.844	0.722	0.0165807	1	JUNB	B memory
2.65971e-14	-0.36087	0.587	0.744	3.87333e-10	6	ARPC2	Treg
3.27684e-17	-0.451677	0.517	0.705	4.77206e-13	6	ARPC3	Treg
8.47438e-09	0.259921	0.582	0.438	0.000123412	6	ATM	Treg
2.02492e-09	-0.277456	0.189	0.337	2.94889e-05	6	ATP2B1	Treg
1.61452e-12	0.381061	1	0.978	2.56451e-08	7	S100A10	CD16 Mono
2.72614e-35	0.266473	1	1	3.97008e-31	1	B2M	Treg
4.77979e-97	-0.614881	1	1	6.96081e-93	6	B2M	Treg
1.15323e-12	-0.315634	0.076	0.239	1.67944e-08	6	C12orf75	Treg
2.10977e-16	-0.380274	0.903	0.961	3.07246e-12	6	CALM1	Treg
4.4561e-08	-0.274787	0.289	0.447	0.000648941	6	CAPZB	Treg
8.76787e-36	0.368701	0.185	0.071	1.60058e-31	11	CCL3	CD8 TEM
1.9328e-08	-0.271104	0.194	0.344	0.000281474	6	CARD16	Treg
8.6166e-13	0.365391	1	1	1.36866e-08	7	S100A6	CD16 Mono
5.09969e-09	-0.284428	0.529	0.645	7.42668e-05	6	CD2	Treg
4.65571e-12	-0.310746	0.838	0.883	6.78012e-08	6	CD3D	Treg
8.93296e-42	-0.590707	0.954	0.977	1.30091e-37	6	CD52	Treg
2.85817e-06	-0.252516	0.312	0.442	0.0416235	6	CD53	Treg
3.77369e-14	-0.431296	0.242	0.426	5.49563e-10	6	CD74	Treg
9.91497e-09	-0.348737	0.342	0.504	0.000144392	6	CD99	Treg
3.321e-13	0.35724	1	1	5.27508e-09	7	FCER1G	CD16 Mono
3.08333e-13	-0.391393	0.767	0.876	4.49025e-09	6	CFL1	Treg
5.17853e-12	-0.34739	0.538	0.717	7.54149e-08	6	CHCHD2	Treg
2.23034e-11	0.26241	0.651	0.473	3.24804e-07	1	CLIC1	Treg
7.54833e-20	-0.552186	0.279	0.539	1.09926e-15	6	CLIC1	Treg
6.54489e-17	-0.47983	0.564	0.738	9.53133e-13	6	CORO1A	Treg
9.50261e-10	-0.317444	0.266	0.424	1.38387e-05	6	COTL1	Treg
3.04279e-09	-0.284386	0.457	0.592	4.43121e-05	6	COX5B	Treg
2.7463e-09	-0.260028	0.097	0.248	3.99944e-05	6	CTSC	Treg
1.3986e-08	0.35248	0.729	0.612	0.000203678	1	CXCR4	Treg
1.95889e-17	0.340574	0.743	0.605	3.57596e-13	11	FOSB	CD8 TEM
8.13249e-20	-0.487042	0.61	0.777	1.18433e-15	6	CYBA	Treg
2.21032e-14	0.336396	1	1	3.51088e-10	7	S100A4	CD16 Mono
1.12881e-08	-0.285498	0.162	0.317	0.000164388	6	DOK2	Treg
1.14093e-19	0.51346	0.725	0.568	1.66153e-15	1	DUSP1	Treg
2.33229e-08	-0.537466	0.446	0.621	0.000339652	6	DUSP1	Treg
3.4473e-16	0.329067	0.907	0.768	6.29304e-12	11	GZMH	CD8 TEM
1.90654e-11	-0.341218	0.247	0.408	2.77649e-07	6	DYNLL1	Treg
6.38419e-07	0.323032	0.491	0.343	0.0101406	7	NR4A2	CD16 Mono
1.70999e-08	0.32303	0.972	0.97	0.000271616	7	RPS26	CD16 Mono
1.71839e-22	0.321279	0.999	0.958	3.13692e-18	11	NKG7	CD8 TEM
1.06545e-41	0.441449	1	0.978	1.55161e-37	6	EEF1B2	Treg
8.95387e-14	-0.292332	0.998	0.999	1.30395e-09	6	EIF1	Treg
7.65181e-09	0.255142	0.859	0.788	0.000111433	6	EIF3E	Treg
4.75071e-22	-0.496843	0.577	0.744	6.91847e-18	6	EMP3	Treg
2.2534e-06	0.308705	0.491	0.361	0.0357929	7	ADGRE1	CD16 Mono
2.16473e-12	-0.335583	0.559	0.696	3.15249e-08	6	EVL	Treg
1.332e-08	-0.313555	0.316	0.462	0.000193979	6	EZR	Treg
1.46131e-09	0.300342	0.917	0.787	2.32114e-05	7	LINC00936	CD16 Mono
5.84912e-15	-0.326248	0.044	0.228	8.51808e-11	6	FAM129A	Treg
5.64806e-09	0.300133	0.949	0.922	7.78415e-05	3	RPL36A	MAIT
1.1877e-08	0.300111	1	0.972	0.000188654	7	TSPO	CD16 Mono
2.27704e-08	0.300092	0.734	0.587	0.000415674	11	FGFBP2	CD8 TEM
2.91515e-12	-0.340806	0.206	0.379	4.24533e-08	6	FLNA	Treg
4.75266e-07	0.362717	0.729	0.656	0.00692129	1	FOS	Treg
6.05434e-20	0.303016	0.992	0.974	8.81693e-16	1	FTH1	Treg
4.1749e-17	-0.42584	0.947	0.982	6.0799e-13	6	FTH1	Treg
2.88604e-11	0.296535	1	1	4.58419e-07	7	RPL41	CD16 Mono
2.36585e-06	-0.311278	0.568	0.696	0.0344539	6	FXYD5	Treg
2.28663e-20	0.295427	1	0.997	3.15143e-16	3	RPS10	MAIT
1.35899e-34	0.295426	0.196	0.062	2.48083e-30	11	TNF	CD8 TEM
2.38927e-06	0.293404	0.833	0.662	0.0379512	7	HLA-DQB1	CD16 Mono
4.46198e-21	-0.557041	0.61	0.796	6.49799e-17	6	GAPDH	Treg
8.66376e-16	-0.413052	0.157	0.358	1.2617e-11	6	GBP5	Treg
5.05659e-07	-0.270354	0.194	0.341	0.00736391	6	GLRX	Treg
3.09502e-13	-0.358137	0.617	0.756	4.50728e-09	6	GMFG	Treg
4.00857e-12	-0.377085	0.462	0.633	5.83769e-08	6	GSTK1	Treg
3.29183e-07	-0.278816	0.346	0.486	0.00479389	6	H2AFZ	Treg
2.85436e-12	-0.305274	0.896	0.946	4.1568e-08	6	H3F3A	Treg
1.31121e-14	-0.359119	0.917	0.967	1.90952e-10	6	H3F3B	Treg
3.98539e-11	0.261586	0.999	0.991	5.80392e-07	1	HLA-A	Treg
1.37233e-19	0.274083	1	0.995	2.17981e-15	7	DUSP1	CD16 Mono
2.63309e-60	-0.796714	0.977	0.995	3.83457e-56	6	HLA-A	Treg
1.9789e-40	-0.547605	0.993	0.997	2.88187e-36	6	HLA-B	Treg
4.0151e-07	0.270256	0.111	0.09	0.00637759	7	MT1X	CD16 Mono
4.0211e-38	-0.6375	0.958	0.987	5.85593e-34	6	HLA-C	Treg
5.96498e-08	0.263852	1	1	0.000947477	7	AIF1	CD16 Mono
8.8231e-09	0.262835	1	0.992	0.000140146	7	UQCRB	CD16 Mono
4.48521e-15	-0.387822	0.079	0.273	6.53182e-11	6	HLA-DPA1	Treg
4.92483e-09	0.261814	0.76	0.706	6.7874e-05	3	RPL17	MAIT
4.72356e-21	-0.498871	0.099	0.337	6.87892e-17	6	HLA-DPB1	Treg
6.03735e-13	0.261488	0.959	0.937	9.30658e-09	2	RPL36A	CD4 TEM
2.99014e-08	-0.276066	0.148	0.262	0.000435454	6	HLA-DRA	Treg
6.43195e-07	0.260647	1	1	0.0102165	7	S100A11	CD16 Mono
2.05911e-21	-0.529689	0.067	0.295	2.99868e-17	6	HLA-DRB1	Treg
1.4545e-09	-0.259004	0.938	0.97	2.11818e-05	6	HLA-E	Treg
7.99337e-31	0.258113	0.999	0.997	1.23218e-26	2	RPS10	CD4 TEM
1.61987e-08	0.257877	0.241	0.08	0.0002573	7	CTB-61M7.2	CD16 Mono
4.13438e-09	-0.301476	0.261	0.412	6.0209e-05	6	IL10RA	Treg
1.18048e-07	0.277288	0.974	0.917	0.00171913	1	IL32	Treg
1.30153e-102	0.254562	1	1	2.00631e-98	2	TPT1	CD4 TEM
7.72414e-55	-1.0082	0.829	0.941	1.12487e-50	6	IL32	Treg
1.22953e-07	0.252004	1	0.997	0.00195299	7	VIM	CD16 Mono
8.57218e-10	0.367644	0.764	0.59	1.24837e-05	6	IL7R	Treg
1.30847e-08	-0.250377	0.224	0.389	0.000190552	6	IQGAP1	Treg
2.20251e-10	-0.349198	0.478	0.633	3.20751e-06	6	ISG20	Treg
3.20468e-30	-0.674632	0.356	0.621	4.66698e-26	6	ITGB1	Treg
1.40957e-09	0.326514	0.871	0.795	2.05275e-05	1	JUN	Treg
6.58608e-24	0.636723	0.829	0.692	9.5913e-20	1	JUNB	Treg
9.36181e-13	-0.253942	0.711	0.782	1.44312e-08	2	NEAT1	CD4 TEM
1.84944e-19	-0.254667	0.423	0.505	2.85092e-15	2	BTG2	CD4 TEM
1.9615e-15	-0.852321	0.552	0.742	2.85654e-11	6	JUNB	Treg
2.63445e-07	-0.257232	1	1	0.00418456	7	SAT1	CD16 Mono
5.1773e-12	0.318216	0.946	0.912	7.53971e-08	1	JUND	Treg
4.462e-10	-0.359871	0.852	0.927	6.49801e-06	6	JUND	Treg
2.90701e-07	-0.260879	0.93	0.959	0.00400645	2	ARL4C	MAIT
5.53738e-07	-0.261209	1	0.996	0.00879558	7	TXNIP	CD16 Mono
3.13219e-07	-0.278626	0.864	0.913	0.00456141	6	KLF2	Treg
5.8017e-10	0.329069	0.724	0.598	8.44902e-06	1	KLF6	Treg
3.19113e-09	-0.401866	0.503	0.641	4.64724e-05	6	KLF6	Treg
3.36694e-20	-0.656449	0.141	0.332	4.90328e-16	6	LGALS1	Treg
1.91767e-13	-0.274664	0.374	0.441	2.83489e-09	1	CRIP1	B memory
2.44682e-13	-0.38513	0.028	0.201	3.5633e-09	6	LGALS3	Treg
2.77927e-19	-0.464766	0.044	0.271	4.04746e-15	6	LINC00152	Treg
6.16163e-11	-0.343894	0.321	0.494	8.97319e-07	6	LSP1	Treg
8.3597e-17	-0.287234	1	1	1.21742e-12	6	MT-CO1	Treg
8.34039e-11	-0.345991	0.997	0.999	1.21461e-06	1	MT-ND3	Treg
1.86862e-26	-0.278802	0.301	0.426	2.88048e-22	2	CST7	CD4 TEM
1.52455e-11	-0.252723	0.998	0.998	2.22021e-07	1	MT-ND4	Treg
1.80957e-10	-0.28115	0.353	0.481	2.49395e-06	3	MT-ND6	MAIT
9.76212e-08	-0.276814	0.794	0.861	0.00142166	6	MYL12A	Treg
9.30754e-13	-0.376539	0.515	0.685	1.35546e-08	6	MYL12B	Treg
8.49972e-27	-0.534617	0.681	0.835	1.23781e-22	6	MYL6	Treg
2.37087e-09	-0.272759	0.584	0.707	3.45269e-05	6	NDUFA4	Treg
1.80904e-16	-0.362166	0.716	0.727	2.6345e-12	6	NEAT1	Treg
1.94212e-10	-0.36397	0.72	0.728	2.82831e-06	1	NEAT1	Treg
1.08386e-16	-0.286024	0.714	0.788	1.49378e-12	3	SYNE2	MAIT
3.78726e-17	-0.453256	0.654	0.812	5.51539e-13	6	OAZ1	Treg
4.89738e-12	0.28644	0.946	0.887	7.13205e-08	1	PFN1	Treg
3.61312e-31	-0.650651	0.778	0.913	5.26179e-27	6	PFN1	Treg
1.10628e-13	0.258267	0.349	0.173	1.61107e-09	6	PLAC8	Treg
1.99714e-13	-0.348844	0.069	0.219	2.90844e-09	6	PMAIP1	Treg
3.97789e-25	-0.289637	0.791	0.823	5.88051e-21	1	GAPDH	B memory
1.14487e-08	-0.284455	0.236	0.393	0.000166728	6	PPP1CA	Treg
2.37323e-22	-0.291374	1	0.999	3.76963e-18	7	MT-ND4	CD16 Mono
2.90536e-09	-0.25573	0.072	0.21	4.23107e-05	6	PRDM1	Treg
1.2526e-06	-0.250201	0.279	0.406	0.0182417	6	PRDX1	Treg
2.97158e-07	-0.273818	0.467	0.592	0.00432751	6	PSMA7	Treg
4.4791e-11	-0.295508	0.662	0.748	6.17309e-07	3	FOSB	MAIT
3.7898e-07	-0.286434	0.303	0.453	0.00551908	6	PSMB8	Treg
5.46046e-26	-0.3022	0.918	0.944	8.41731e-22	2	JUNB	CD4 TEM
1.4049e-08	-0.315718	0.296	0.472	0.000204596	6	PSMB9	Treg
1.73024e-08	-0.372403	0.129	0.281	0.000251974	6	RGS1	Treg
1.71604e-08	-0.309157	0.716	0.788	0.000236504	2	SYNE2	MAIT
2.99477e-12	-0.311806	0.27	0.414	4.36128e-08	6	RORA	Treg
1.42725e-26	0.271871	1	0.998	2.0785e-22	6	RPL10A	Treg
3.22635e-18	0.271052	1	0.999	4.69853e-14	6	RPL12	Treg
7.41697e-45	0.314516	1	1	1.08013e-40	6	RPL13	Treg
4.30933e-23	0.296973	1	1	6.27567e-19	6	RPL13A	Treg
1.08009e-07	-0.312585	0.691	0.771	0.00148858	2	NEAT1	MAIT
1.43222e-55	0.510043	1	1	2.08575e-51	6	RPL21	Treg
2.0221e-29	0.356041	1	0.999	2.94478e-25	6	RPL22	Treg
1.09215e-21	0.384384	0.995	0.989	1.5905e-17	6	RPL23	Treg
2.78377e-15	-0.315802	0.681	0.772	3.83659e-11	3	NEAT1	MAIT
9.13068e-24	0.293039	1	1	1.3297e-19	6	RPL27A	Treg
1.37283e-15	-0.320916	1	0.999	2.18061e-11	7	MT-ND2	CD16 Mono
1.48935e-08	-0.320982	0.916	0.925	0.000205262	3	JUN	MAIT
6.85263e-30	-0.32231	0.898	0.932	1.05633e-25	2	FOS	CD4 TEM
2.9274e-35	-0.322349	0.64	0.739	4.51259e-31	2	SRGN	CD4 TEM
1.82105e-37	0.297732	1	1	2.652e-33	6	RPL30	Treg
7.13604e-25	0.361385	0.998	0.979	1.03922e-20	6	RPL31	Treg
1.23685e-19	-0.326646	0.245	0.338	1.90661e-15	2	NKG7	CD4 TEM
4.82127e-44	0.34849	1	1	7.02122e-40	6	RPL32	Treg
6.77348e-07	-0.335136	0.602	0.648	0.0100132	1	NEAT1	B memory
2.97941e-25	-0.335223	1	1	4.7325e-21	7	MT-CO3	CD16 Mono
1.23764e-49	0.433293	1	1	1.80237e-45	6	RPL34	Treg
6.37998e-41	0.377131	1	1	9.29117e-37	6	RPL35A	Treg
2.37521e-20	0.301443	1	1	3.45902e-16	6	RPL36	Treg
2.15751e-11	0.447979	0.942	0.872	3.14199e-07	6	RPL36A	Treg
1.10627e-32	0.340686	1	1	1.61106e-28	6	RPL37	Treg
6.87168e-26	0.34632	1	1	1.00072e-21	6	RPL37A	Treg
1.2203e-23	-0.347193	0.607	0.7	1.88109e-19	2	FOSB	CD4 TEM
1.13363e-28	0.374583	1	0.998	1.65091e-24	6	RPL38	Treg
6.69936e-56	0.491301	1	1	9.75628e-52	6	RPL39	Treg
1.52864e-38	0.335609	1	1	2.22616e-34	6	RPL5	Treg
1.84308e-13	0.277585	1	0.996	2.68408e-09	6	RPL7	Treg
4.9321e-26	0.274241	1	1	7.18262e-22	6	RPL9	Treg
9.32271e-44	0.442408	1	1	1.35767e-39	6	RPLP2	Treg
1.14004e-06	0.295734	1	0.99	0.0166024	6	RPS10	Treg
4.44216e-25	-0.355977	0.515	0.644	6.84759e-21	2	GZMA	CD4 TEM
1.2933e-25	0.356801	1	0.998	1.88343e-21	6	RPS11	Treg
6.92328e-57	0.485868	1	1	1.00824e-52	6	RPS12	Treg
7.76736e-43	0.378235	1	0.999	1.13116e-38	6	RPS13	Treg
3.09262e-27	-0.359817	0.704	0.749	4.57183e-23	1	SUB1	B memory
3.08335e-44	0.363718	1	1	4.49028e-40	6	RPS14	Treg
3.82725e-28	0.283359	1	1	5.57363e-24	6	RPS15A	Treg
6.3698e-37	0.341399	1	1	9.27633e-33	6	RPS16	Treg
2.78004e-23	0.364159	0.986	0.971	4.04857e-19	6	RPS17	Treg
6.11877e-28	0.254805	1	1	8.91077e-24	6	RPS18	Treg
4.69261e-15	0.251301	1	1	6.83385e-11	6	RPS19	Treg
3.22519e-36	0.443443	1	0.996	4.69685e-32	6	RPS20	Treg
9.84247e-25	0.332424	1	0.998	1.43336e-20	6	RPS21	Treg
2.48762e-28	-0.378492	0.724	0.798	3.83467e-24	2	IER2	CD4 TEM
1.92849e-36	0.381821	1	1	2.80846e-32	6	RPS27	Treg
1.7791e-33	0.31092	1	1	2.5909e-29	6	RPS27A	Treg
8.74959e-07	-0.38725	0.333	0.473	0.0138978	7	PARP14	CD16 Mono
7.84233e-43	0.385723	1	1	1.14208e-38	6	RPS28	Treg
2.99971e-61	-0.391083	0.997	1	4.1342e-57	3	MALAT1	MAIT
1.11051e-35	0.352061	1	1	1.61723e-31	6	RPS29	Treg
2.5796e-11	-0.397175	0.264	0.371	4.70906e-07	11	GZMK	CD8 TEM
1.92543e-13	-0.397211	0.352	0.434	3.05835e-09	7	MT-ND6	CD16 Mono
6.11063e-39	0.359151	1	1	8.89891e-35	6	RPS3A	Treg
1.37474e-33	-0.407513	0.876	0.911	2.03228e-29	1	ACTG1	B memory
3.38126e-08	0.386805	0.587	0.39	0.000492414	6	RPS4Y1	Treg
1.64998e-06	-0.413066	0.352	0.494	0.0262082	7	HMGN1	CD16 Mono
6.7366e-22	-0.414426	0.241	0.342	1.22977e-17	11	LTB	CD8 TEM
8.79085e-35	0.376735	1	0.996	1.28021e-30	6	RPS5	Treg
3.89154e-37	-0.421053	0.412	0.569	5.99881e-33	2	DUSP2	CD4 TEM
1.98477e-45	0.371395	1	1	2.89042e-41	6	RPS6	Treg
1.72916e-59	0.42683	1	1	2.51817e-55	6	RPS8	Treg
9.48353e-26	0.252526	1	0.999	1.38109e-21	6	RPS9	Treg
6.10547e-23	-0.447571	1	1	9.69793e-19	7	MT-CO2	CD16 Mono
1.57954e-15	0.341026	0.894	0.784	2.30029e-11	1	S100A10	Treg
2.1767e-30	-0.451904	1	0.991	3.45747e-26	7	MT-ND5	CD16 Mono
6.61456e-36	-0.766872	0.644	0.827	9.63278e-32	6	S100A10	Treg
1.54607e-12	0.279408	0.577	0.42	2.25153e-08	1	S100A11	Treg
1.77438e-13	-0.453083	0.3	0.473	2.58403e-09	6	S100A11	Treg
2.61729e-17	0.397809	0.961	0.874	3.81157e-13	1	S100A4	Treg
1.23308e-82	-1.26718	0.727	0.912	1.79574e-78	6	S100A4	Treg
1.38843e-13	0.260716	0.932	0.869	2.02198e-09	1	S100A6	Treg
6.84602e-33	-0.467269	1	1	1.08742e-28	7	MT-ATP6	CD16 Mono
1.06199e-42	-0.469471	0.888	0.933	1.63705e-38	2	JUN	CD4 TEM
4.09101e-32	-0.615913	0.783	0.894	5.95774e-28	6	S100A6	Treg
1.09936e-16	-0.541631	0.425	0.566	1.601e-12	6	SAT1	Treg
5.09519e-43	-0.485292	0.554	0.748	7.85423e-39	2	GZMK	CD4 TEM
6.08561e-19	0.340368	0.963	0.892	8.86248e-15	1	SH3BGRL3	Treg
2.83315e-41	-0.731615	0.801	0.92	4.12592e-37	6	SH3BGRL3	Treg
2.5925e-09	-0.310692	0.457	0.593	3.77545e-05	6	SMCHD1	Treg
3.01332e-10	-0.291952	0.194	0.356	4.3883e-06	6	SPTAN1	Treg
2.71651e-16	-0.489737	0.319	0.552	3.95605e-12	6	SRGN	Treg
3.62778e-35	-0.504091	0.565	0.649	5.36295e-31	1	S100A10	B memory
2.48656e-11	-0.310513	0.547	0.678	3.62118e-07	6	SUB1	Treg
3.18451e-28	-0.528112	1	1	5.05827e-24	7	MT-CYB	CD16 Mono
2.02954e-09	-0.307812	0.57	0.707	2.95562e-05	6	SUMO2	Treg
4.89278e-13	-0.433533	0.43	0.572	7.12535e-09	6	SYNE2	Treg
1.56412e-08	-0.340067	0.339	0.506	0.000227783	6	TAGLN2	Treg
8.46216e-12	0.311246	0.573	0.388	1.23234e-07	6	TCF7	Treg
1.01376e-44	-0.514146	1	1	1.47634e-40	6	TMSB10	Treg
9.68269e-38	0.288276	1	1	1.41009e-33	1	TMSB4X	Treg
8.38498e-57	-0.577292	1	1	1.2211e-52	6	TMSB4X	Treg
3.23457e-06	-0.294428	0.164	0.294	0.0471051	6	TNFAIP3	Treg
5.98632e-13	0.297886	0.984	0.959	8.71788e-09	6	TOMM7	Treg
1.66189e-26	-0.556704	1	1	2.63974e-22	7	MT-CO1	CD16 Mono
2.02436e-08	-0.282415	0.587	0.683	0.000294808	6	TPM3	Treg
6.69854e-11	-0.464929	0.684	0.817	9.75508e-07	6	TRAC	Treg
1.16912e-13	0.399284	0.843	0.755	1.70259e-09	1	TSC22D3	Treg
5.23371e-11	-0.456837	0.702	0.783	7.62186e-07	6	TSC22D3	Treg
1.18969e-10	-0.350815	0.275	0.445	1.73255e-06	6	TTC39C	Treg
3.335e-10	-0.359736	0.187	0.297	4.85675e-06	6	TTN	Treg
2.49668e-08	-0.64839	0.285	0.425	0.000369085	1	IGLC2	B memory
8.82826e-09	-0.28306	0.162	0.341	0.000128566	6	TXN	Treg
7.07845e-08	-0.287422	0.559	0.691	0.00103083	6	UBB	Treg
6.53074e-37	-0.67144	0.282	0.45	1.19219e-32	11	IL7R	CD8 TEM
5.26545e-16	0.277406	0.96	0.893	7.66807e-12	1	UBC	Treg
3.96852e-28	-0.545048	0.822	0.918	5.77936e-24	6	UBC	Treg
3.71482e-10	-0.288278	0.52	0.643	5.40989e-06	6	UBL5	Treg
1.96485e-07	-0.289198	0.457	0.577	0.00286141	6	USP15	Treg
9.47043e-07	-0.783486	0.186	0.275	0.0140001	1	IGLC3	B memory
2.12131e-11	0.300319	0.899	0.856	3.08926e-07	1	VIM	Treg
1.39393e-16	-0.542291	0.79	0.874	2.02998e-12	6	VIM	Treg
7.41619e-10	-0.874644	0.111	0.407	1.17799e-05	7	XIST	CD16 Mono
5.61257e-10	-0.352094	0.233	0.379	8.17358e-06	6	XIST	Treg
1.29668e-10	-0.327212	0.584	0.734	1.88835e-06	6	YWHAB	Treg

## Sheet: Proteins
p_val	avg_diff	pct.1	pct.2	p_val_adj	Cluster	Protein	CellType
1.95932e-30	-0.517542	0.336	0.545	5.05504e-28	1	CD71	B memory
4.2929e-22	0.418734	0.614	0.425	1.10757e-19	1	CD24	B memory
2.74585e-18	-0.44176	0.247	0.449	7.08428e-16	1	CD95-Fas	B memory
8.70659e-16	-0.355274	0.304	0.466	2.2463e-13	1	CD99	B memory
2.64361e-15	-0.379629	0.211	0.384	6.82052e-13	1	CD11c	B memory
1.16558e-12	-0.295908	0.283	0.427	3.00719e-10	1	Iglightchainlambda	B memory
3.72374e-12	-0.306417	0.375	0.494	9.60725e-10	1	CD18	B memory
4.00246e-10	-0.26697	0.408	0.533	1.03263e-07	1	CD81-TAPA-1	B memory
5.9068e-10	-0.278487	0.394	0.529	1.52395e-07	1	CD164	B memory
8.63597e-10	-0.311615	0.294	0.42	2.22808e-07	1	CD62L	B memory
1.31022e-08	-0.254524	0.42	0.535	3.38036e-06	1	CD39	B memory
9.7474e-05	-0.475306	0.034	0.241	0.0251483	7	TSPAN33-BAAM	CD16 Mono
1.03583e-26	0.389724	0.594	0.416	2.67245e-24	2	CD55	CD4 TEM
3.34739e-20	-0.353424	0.362	0.522	8.63626e-18	2	CD18	CD4 TEM
1.4673e-17	-0.345455	0.357	0.515	3.78562e-15	2	CD84	CD4 TEM
2.97497e-16	-0.32826	0.356	0.49	7.67544e-14	2	CD11a	CD4 TEM
3.53925e-16	-0.35718	0.337	0.468	9.13126e-14	2	CD279-PD-1	CD4 TEM
2.2656e-14	-0.28994	0.418	0.543	5.84524e-12	2	CD352-NTB-A	CD4 TEM
3.04672e-14	0.316316	0.616	0.497	7.86054e-12	2	CD127-IL-7Ralpha	CD4 TEM
7.50335e-14	-0.30618	0.368	0.5	1.93586e-11	2	CD81-TAPA-1	CD4 TEM
5.60844e-13	-0.274111	0.398	0.526	1.44698e-10	2	CD99	CD4 TEM
1.68259e-12	-0.299859	0.323	0.442	4.34107e-10	2	CD195-CCR5	CD4 TEM
9.0703e-11	-0.2992	0.307	0.38	2.34014e-08	2	HLA-DR-DP-DQ	CD4 TEM
7.33104e-10	0.291825	0.443	0.321	1.89141e-07	2	integrinbeta7	CD4 TEM
6.76684e-14	-0.301512	0.352	0.475	1.74585e-11	11	CD48	CD8 TEM
8.06391e-14	-0.312177	0.22	0.352	2.08049e-11	11	CD28	CD8 TEM
5.24216e-13	-0.316498	0.25	0.367	1.35248e-10	11	CD127-IL-7Ralpha	CD8 TEM
5.40869e-13	0.317464	0.702	0.574	1.39544e-10	11	GPR56	CD8 TEM
1.03665e-12	-0.291782	0.334	0.453	2.67455e-10	11	CD321	CD8 TEM
1.85768e-10	-0.290333	0.345	0.437	4.79282e-08	11	CD7	CD8 TEM
9.90852e-10	-0.250703	0.405	0.494	2.5564e-07	11	CD99	CD8 TEM
1.93137e-09	-0.258093	0.351	0.445	4.98294e-07	11	CD183-CXCR3	CD8 TEM
1.04351e-08	-0.267999	0.244	0.339	2.69225e-06	11	CD62L	CD8 TEM
3.00742e-08	-0.268611	0.174	0.271	7.75914e-06	11	CD26	CD8 TEM
8.73474e-07	-0.25452	0.373	0.505	0.000225356	3	CD45RO	MAIT
4.5754e-20	0.453294	0.683	0.444	1.18045e-17	1	CD194-CCR4	Treg
1.02625e-16	0.417313	0.666	0.461	2.64773e-14	1	CD45RO	Treg
1.1753e-17	0.410452	0.688	0.456	3.03227e-15	1	CD95-Fas	Treg
1.55958e-15	0.37952	0.634	0.451	4.02373e-13	1	TIGIT-VSTM3	Treg
1.56919e-09	0.282471	0.615	0.479	4.04851e-07	1	CD352-NTB-A	Treg
1.3737e-08	0.267733	0.565	0.453	3.54413e-06	1	CD29	Treg
1.7896e-09	0.265091	0.497	0.378	4.61718e-07	1	CD58-LFA-3	Treg
1.79349e-09	0.264203	0.565	0.426	4.6272e-07	1	CD99	Treg
3.26971e-08	0.26045	0.546	0.397	8.43586e-06	1	CD96-TACTILE	Treg
6.43819e-08	0.25035	0.471	0.382	1.66105e-05	1	CD279-PD-1	Treg
1.19659e-07	-0.261772	0.393	0.516	3.08721e-05	1	CD81-TAPA-1	Treg
1.86684e-06	-0.263853	0.307	0.412	0.000481644	1	CD31	Treg
5.95837e-10	-0.274204	0.25	0.379	1.53726e-07	1	CD38	Treg
5.79473e-10	-0.27843	0.274	0.429	1.49504e-07	1	CD26	Treg
8.77363e-14	-0.319087	0.213	0.368	2.2636e-11	1	GP130	Treg
5.88612e-13	-0.361015	0.347	0.51	1.51862e-10	1	CD45RB	Treg
4.55403e-22	-0.502265	0.153	0.381	1.17494e-19	1	CD45RA	Treg
4.78335e-15	0.593345	0.677	0.295	1.23411e-12	6	CD45RA	Treg
3.05674e-09	0.55657	0.634	0.371	7.88638e-07	6	CD26	Treg
8.58913e-09	0.550168	0.731	0.449	2.21599e-06	6	CD45RB	Treg
3.33323e-05	0.445008	0.624	0.472	0.00859973	6	CD81-TAPA-1	Treg
3.88974e-07	0.44228	0.72	0.441	0.000100355	6	CD305-LAIR1	Treg
1.26612e-06	0.44222	0.699	0.427	0.00032666	6	CD55	Treg
3.56076e-05	0.394028	0.742	0.471	0.00918676	6	CD7	Treg
3.11947e-08	0.336758	0.624	0.369	8.04823e-06	6	CD31	Treg
0.000139382	0.302784	0.247	0.113	0.0359604	6	CD42b	Treg
0.00013623	0.287852	0.473	0.302	0.0351472	6	CD9	Treg
2.36438e-07	0.251294	0.398	0.318	6.10011e-05	6	GP130	Treg
2.07206e-05	-0.329598	0.204	0.355	0.00534591	6	CD195-CCR5	Treg
8.53325e-05	-0.369802	0.269	0.422	0.0220158	6	CD44	Treg
1.85046e-06	-0.413235	0.161	0.46	0.000477417	6	CD18	Treg
5.61706e-06	-0.454933	0.237	0.462	0.0014492	6	CD82	Treg
1.51194e-08	-0.475692	0.043	0.293	3.90081e-06	6	HLA-DR-DP-DQ	Treg
8.31747e-08	-0.485565	0.204	0.419	2.14591e-05	6	CD279-PD-1	Treg
7.22836e-07	-0.496686	0.258	0.517	0.000186492	6	TIGIT-VSTM3	Treg
2.3489e-08	-0.529865	0.161	0.482	6.06016e-06	6	CD99	Treg
1.9878e-06	-0.536301	0.194	0.414	0.000512852	6	HLA-A-B-C	Treg
2.101e-07	-0.540986	0.29	0.503	5.42058e-05	6	CD28	Treg
1.57121e-06	-0.553989	0.161	0.426	0.000405371	6	CD58-LFA-3	Treg
1.8234e-09	-0.609608	0.258	0.532	4.70438e-07	6	CD352-NTB-A	Treg
3.13328e-12	-0.624806	0.022	0.358	8.08385e-10	6	CD71	Treg
4.02527e-09	-0.627449	0.129	0.453	1.03852e-06	6	CD84	Treg
3.7149e-11	-0.66902	0.183	0.473	9.58445e-09	6	CD278-ICOS	Treg
3.3841e-14	-0.672883	0.097	0.408	8.73098e-12	6	CD39	Treg
1.93558e-15	-0.818794	0.151	0.54	4.99379e-13	6	CD45RO	Treg
4.3637e-17	-0.869441	0.118	0.534	1.12583e-14	6	CD194-CCR4	Treg
4.05049e-22	-1.00919	0.097	0.546	1.04503e-19	6	CD95-Fas	Treg
